# Supplementary material
Source: PubMed Central journal article supplement (PMC3579137)
Supplement: emboj2012334df3.pdf [file emboj2012334df3.pdf]

Figure 3B : In vitro phosphorylation of GluK5

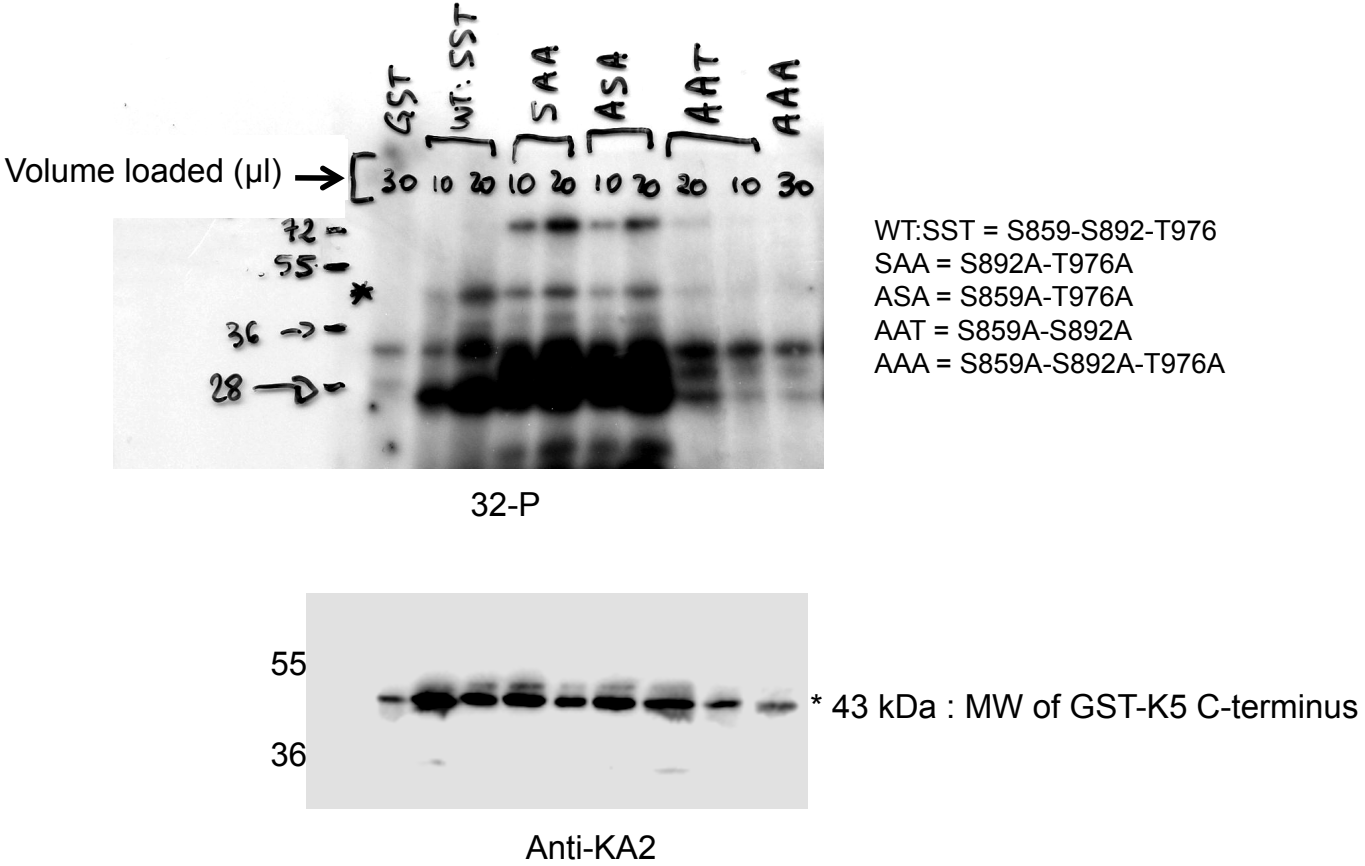

Figure 3C : EC / IC localization of GluK2/GluK5 expressed in COS cells.

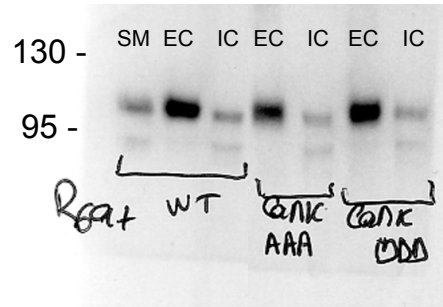

Anti-K2a

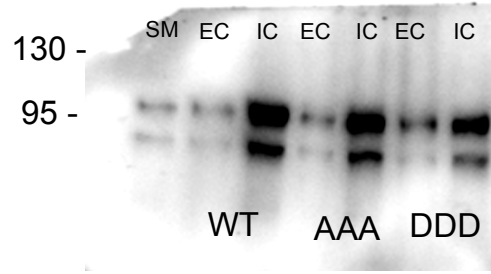

Anti-Myc (K2b)

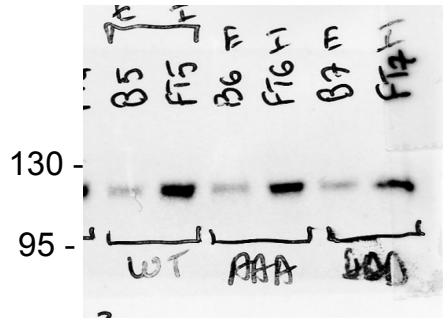

Anti-K5

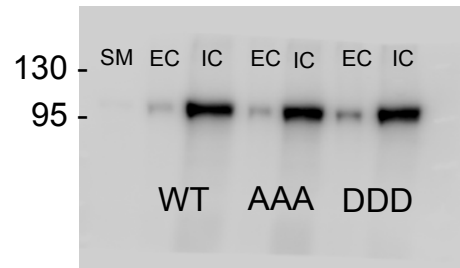

Anti-K5
