# Supplementary material
Source: PubMed Central journal article supplement (PMC3579137)

Figure 6A : GST Pulldown

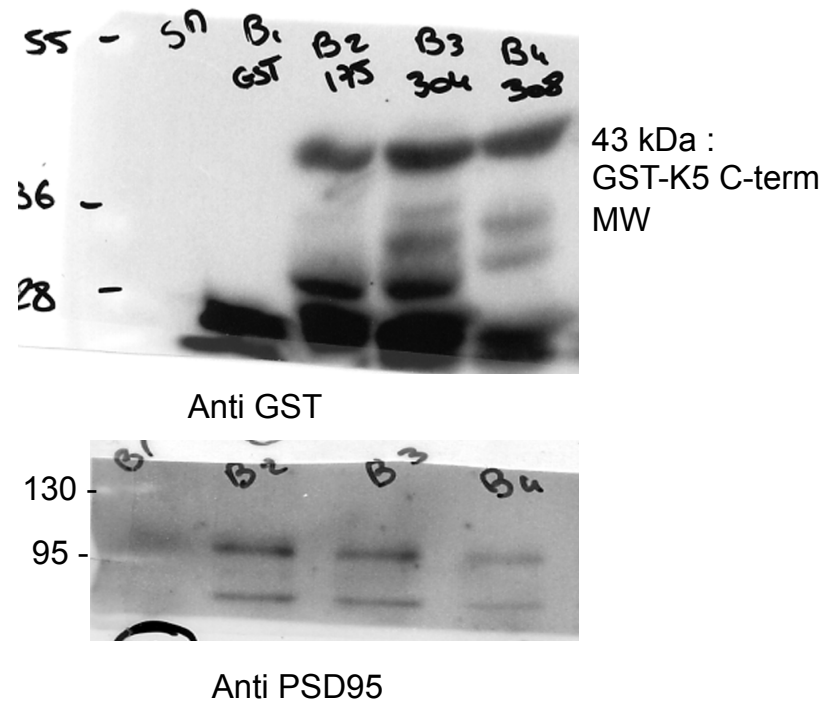

B1 = GST  
B2 = GST-WT  
B3 = GST- AAA  
B4 = GST-DDD

Figure 6B : Co-IP GluK5 / PSD95

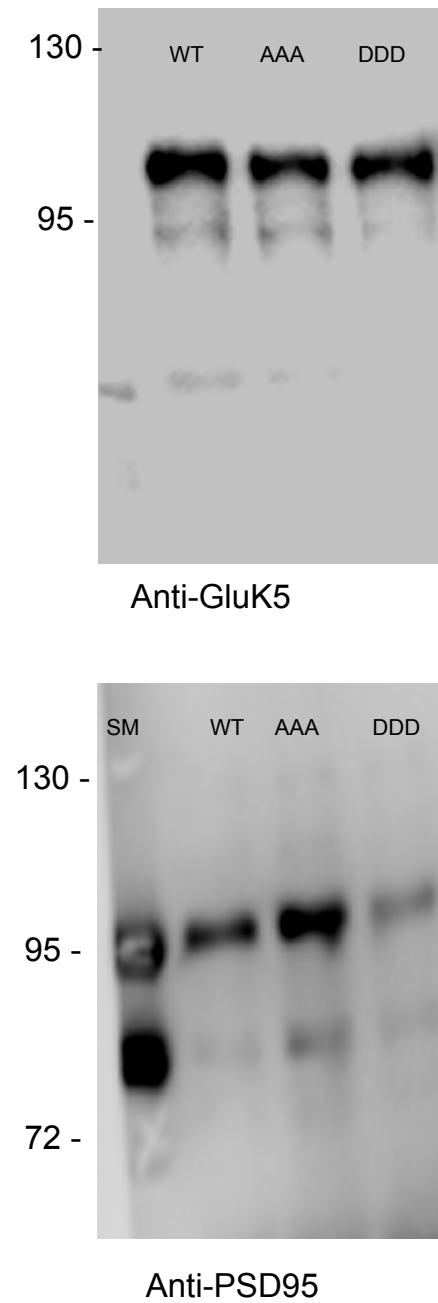

Supplement: emboj2012334df6.pdf [file emboj2012334df6.pdf]
